# Supplementary material
Source: publisher site journal article supplement (https://www.dovepress.com/article/152584)
Supplement: Supplementary file 1 [file get_supplementary_file.php]

## Supplemental Materials

**Table S1 Participating study sites and associated ethics committees**

| Site                                                   | Ethics committee                            |
|--------------------------------------------------------|---------------------------------------------|
| Aishin Cardiovascular Clinic                           | Adachi Kyosai Hospital Ethics Committee*    |
| Akita City Hospital                                    | Akita City Hospital Ethics Committee        |
| Anno Cardiology Clinic                                 | Adachi Kyosai Hospital Ethics Committee*    |
| Chikamori Hospital                                     | Chikamori Hospital Ethics Committee         |
| Fukuoka Wajiro Hospital                                | Fukuoka Wajiro Hospital Ethics Committee    |
| Hachioji Naika Clinic                                  | Adachi Kyosai Hospital Ethics Committee*    |
| Hasegawa Outpatients Clinic for Cardiovascular Disease | Adachi Kyosai Hospital Ethics Committee*    |
| Hirasawa Cardiovascular Clinic                         | Adachi Kyosai Hospital Ethics Committee*    |
| Hiroshi Yamaguchi Clinic                               | Adachi Kyosai Hospital Ethics Committee*    |
| Ichiki Clinic                                          | Adachi Kyosai Hospital Ethics Committee*    |
| Inoue Cardiovascular Clinic                            | Adachi Kyosai Hospital Ethics Committee*    |
| Kanazawa Medical Center                                | Hospital Medical Committee                  |
| Kawahara Medical Clinic                                | Adachi Kyosai Hospital Ethics Committee*    |
| Kinugawa Cardiology Clinic                             | Adachi Kyosai Hospital Ethics Committee*    |
| Machii Heart Clinic                                    | Adachi Kyosai Hospital Ethics Committee*    |
| Mineki Naika Clinic                                    | Adachi Kyosai Hospital Ethics Committee*    |
| Miyanomori Memorial Hospital                           | Adachi Kyosai Hospital Ethics Committee*    |
| Miyanosawa Cardiovascular Clinic                       | Adachi Kyosai Hospital Ethics Committee*    |
| Murakami Clinic                                        | Adachi Kyosai Hospital Ethics Committee*    |
| Nakayama Clinic                                        | Adachi Kyosai Hospital Ethics Committee*    |
| Owari Clinic                                           | Adachi Kyosai Hospital Ethics Committee*    |
| Sakurabashi Watanabe Hospital                          | Hospital Clinical Trial Ethics Committee    |
| Sato Pediatrics and Internal Clinic                    | Adachi Kyosai Hospital Ethics Committee*    |
| Shimozono Clinic                                       | Adachi Kyosai Hospital Ethics Committee*    |
| Shindo Clinic                                          | Adachi Kyosai Hospital Ethics Committee*    |
| Sumi Cardiovascular Clinic                             | Adachi Kyosai Hospital Ethics Committee*    |
| Takaishi Fujii Cardiovascular Hospital                 | Adachi Kyosai Hospital Ethics Committee*    |
| Takashima Clinic                                       | Adachi Kyosai Hospital Ethics Committee*    |
| Tsumura Cardiovascular Clinic                          | Adachi Kyosai Hospital Ethics Committee*    |
| Urayasu Central Hospital                               | Adachi Kyosai Hospital Ethics Committee*    |
| Yamanashi Prefectural Central Hospital                 | Hospital Clinical Research Review Committee |
| Yokohama Sakae Kyosai Hospital                         | Hospital Clinical Trial Ethics Committee    |
| Yoshida Naika Junkankika                               | Adachi Kyosai Hospital Ethics Committee*    |

\*Adachi Kyosai Hospital Ethics Committee was the central ethics committee for this study.

**Figure S1 Questionnaire for physicians**

|             |  |
|-------------|--|
| Institution |  |
| Your name   |  |

Please answer the following questions regarding anticoagulant therapy for prevention of cardioembolic stroke.

**<Q1> The number of patients treated with an anticoagulant**

- ✓ The number of patients treated with an OAC: ( ) patients per month
- ✓ The number of patients treated with warfarin: ( ) patients per month
- ✓ The number of NVAf patients treated with warfarin: ( ) patients per month

**<Q2> PT-INR measurement**

- ☐ outsourced    ☐ in-hospital (POCT device use)    ☐ in-hospital (laboratory)

**<Q3> Frequency of PT-INR measurements**

- ☐ once every 1-3 weeks
- ☐ once every 4 weeks
- ☐ once every 6 weeks
- ☐ once every 8 weeks
- ☐ once every 12 weeks
- ☐ once every 24 weeks
- ☐ other ( )
- ☐ irregular, depending on patient condition or PT-INR control level

**<Q4> PT-INR control level**

Percent of patients whose PT-INR is stably controlled within the therapeutic range recommended by Japanese guidelines (2.0–3.0 in patients aged less than 70, 1.6–2.6 in patients aged equal to or over 70)

- ☐ less than 50%    ☐ 50%    ☐ 60%    ☐ 70%    ☐ 80%    ☐ 90%    ☐ 100%

**<Q5> Do you prescribe warfarin for OAC-naïve patients?**

- ☐ For patients for whom DOAC is indicated.
- ☐ Only for patients for whom DOAC is contraindicated.
- ☐ No

**<Q6> Have you ever experienced bleeding or embolic events in patients treated with**

**warfarin?**

- ✓ Major bleeding: ☐ Yes ☐ No
- ✓ Any bleeding: ☐ Yes ☐ No
- ✓ Cardioembolic events : ☐ Yes ☐ No

**<Q7> Which patients do you think are suitable for warfarin treatment? (check all that apply)**

- ☐ Patients with decreased renal function
  - (Serum creatinine greater than \_\_\_\_\_mg/dL)
- ☐ Patients with low body weight
  - (less than \_\_\_\_\_kg)
- ☐ Patients whose PT-INR is controlled within the guideline-recommended therapeutic range.
- ☐ Patients whose PT-INR is controlled below the guideline-recommended therapeutic range, but no cardioembolic stroke occurred
- ☐ Patients who are satisfied with warfarin
- ☐ Frequent dose adjustment is needed for the patients
- ☐ Self-pay ratio of medical cost
  - ☐ 0%
  - ☐ 10%
  - ☐ 20%
  - ☐ 30%
- ☐ NVAf patients with coronary artery disease
- ☐ NVAf patients with mitral valve stenosis
- ☐ NVAf patients with valvular disease
- ☐ Other (\_\_\_\_\_)

**<Q8> When a PT-INR value falls below the therapeutic range of warfarin recommended by the guidelines (2.0–3.0 in patients aged <70 years, 1.6–2.6 in patients aged ≥70 years), which is the most appropriate action?**

- ☐ Continue treatment at the same dose if there are no concerns about effectiveness and safety.
- ☐ Try to identify the cause of abrupt suboptimal control of PT-INR and educate the patient if necessary.
- ☐ Continue the same treatment, but if PT-INR is suboptimal again at the next visit, consider changing treatment.
- ☐ Change warfarin to DOAC
- ☐ Increase warfarin dose
- ☐ Refer the patient to a specialist
- ☐ Other (\_\_\_\_\_)

**<Q9> When PT-INR values are consistently within the therapeutic range for warfarin recommended by the guidelines (2.0–3.0 in patients aged <70 years, 1.6–2.6 in patients aged ≥70 years), which is the most appropriate action?**

- ☐ Continue treatment with warfarin therapy if there are no concerns about effectiveness and safety.
- ☐ Change warfarin to DOAC if patient requests it.
- ☐ Change all patients on warfarin to DOAC for greater effectiveness and safety if possible.
- ☐ Change warfarin to DOAC when PT-INR is stably controlled.
- ☐ Other (\_\_\_\_\_)

**<Q10> When PT-INR values are consistently below the therapeutic range for warfarin recommended by the guidelines (2.0–3.0 in patients aged <70 years, 1.6–2.6 in patients aged ≥70 years) but there are no concerns about effectiveness and safety, which is the most appropriate action?**

- ☐ Continue treatment with warfarin therapy
- ☐ Increase warfarin dose to achieve a PT-INR value within the therapeutic range
- ☐ Change warfarin to DOAC at a low dose
- ☐ Change warfarin to DOAC at a standard dose
- ☐ Other (\_\_\_\_\_)

**<Q11> When patients experience any bleeding while being treated with warfarin, which is the most appropriate action?**

- ☐ Explain to the patient that anticoagulant therapy is very important for prevention of cardioembolic stroke and minor bleeding is a sign of effectiveness of anticoagulant therapy, and continue treatment with warfarin therapy.
- ☐ Continue treatment at the same dose if the bleeding is nonserious.
- ☐ Reduce a dose of warfarin
- ☐ Change warfarin to DOAC
- ☐ Discontinue anticoagulant therapy
- ☐ Other (\_\_\_\_\_)

**<Q12> Which patients do you think are suitable for switching to DOACs? (check all that apply)**

- ☐ All patients for whom DOACs are indicated.
- ☐ When PT-INR values are not consistently within the therapeutic range for warfarin recommended by the guidelines
- ☐ Patients with fluctuations in PT-INR
- ☐ Patients who do not adhere to dietary restrictions
- ☐ Patients with signs of dehydration

- ☐ Patients aged less than 65 years
- ☐ Patients aged equal to or over 65 and less than 75 years
- ☐ Patients aged equal to or over 75 years
- ☐ Patients with diabetes mellitus
- ☐ Patients concomitantly treated with NSAIDs
- ☐ Patients concomitantly treated with an antiplatelet drug
- ☐ Patients requiring surgery
- ☐ Patients scheduled for an ablation treatment
- ☐ Patients scheduled for a dental procedure
- ☐ Patients with dementia
- ☐ Patients with depression
- ☐ Self-pay ratio of medical cost:
  - ☐ 0%
  - ☐ 10%
  - ☐ 20%
  - ☐ 30%
- ☐ Other ( \_\_\_\_\_ )

**<Q13> When switching from warfarin to a DOAC, are there any concerns about effectiveness and safety during the transition?**

- ☐ There are concerns about bleeding events because of overlapping of anticoagulants
- ☐ There are concerns about ischemic events because of an inadequate dose of anticoagulants
- ☐ No concerns if PT-INR is regularly measured
- ☐ No concerns

**<Q14> Please write the schedule of switching from warfarin to DOACs.**
